# Supplementary material for: Multiparametric MRI to quantify disease and treatment response in mice with myeloproliferative neoplasms
Source: JCI journal article supplement (doi:10.1172/jci.insight.161457), 2022-08-23
Supplement: sd1 [file 1]

You are being redirected.
